# Supplementary material for: The Risk of Retinopathy of Prematurity in the Infants following Assisted Reproductive Technology: A Meta-Analysis
Source: Biomed Res Int. 2019 Jul 11;2019:2095730. doi: 10.1155/2019/2095730 (PMC6657639; doi:10.1155/2019/2095730)
Supplement: Supplementary Materials — Supplementary Figure 1: the sensitivity analysis of the main meta-analysis. Supplementary Figure 2: the summary sheet and the funnel plot of Egger's method. [file 2095730.f1.pdf]

## **Supplementary Materials**

### **The risk of retinopathy of prematurity in the infants following assisted reproductive technology: a meta-analysis**

Lixiong Gao<sup>1</sup>, Weiyang Shao<sup>1</sup>, Na Li<sup>1</sup>, Hongzhen Jia<sup>1</sup>, Chunyu Tian<sup>1</sup>, Xiujun Peng<sup>1</sup>, Qian Shi<sup>1\*</sup>

<sup>1</sup> Ophthalmology Department, the 6<sup>th</sup> Medical Centre of Chinese People's Liberation Army General Hospital, Beijing, 100048, China

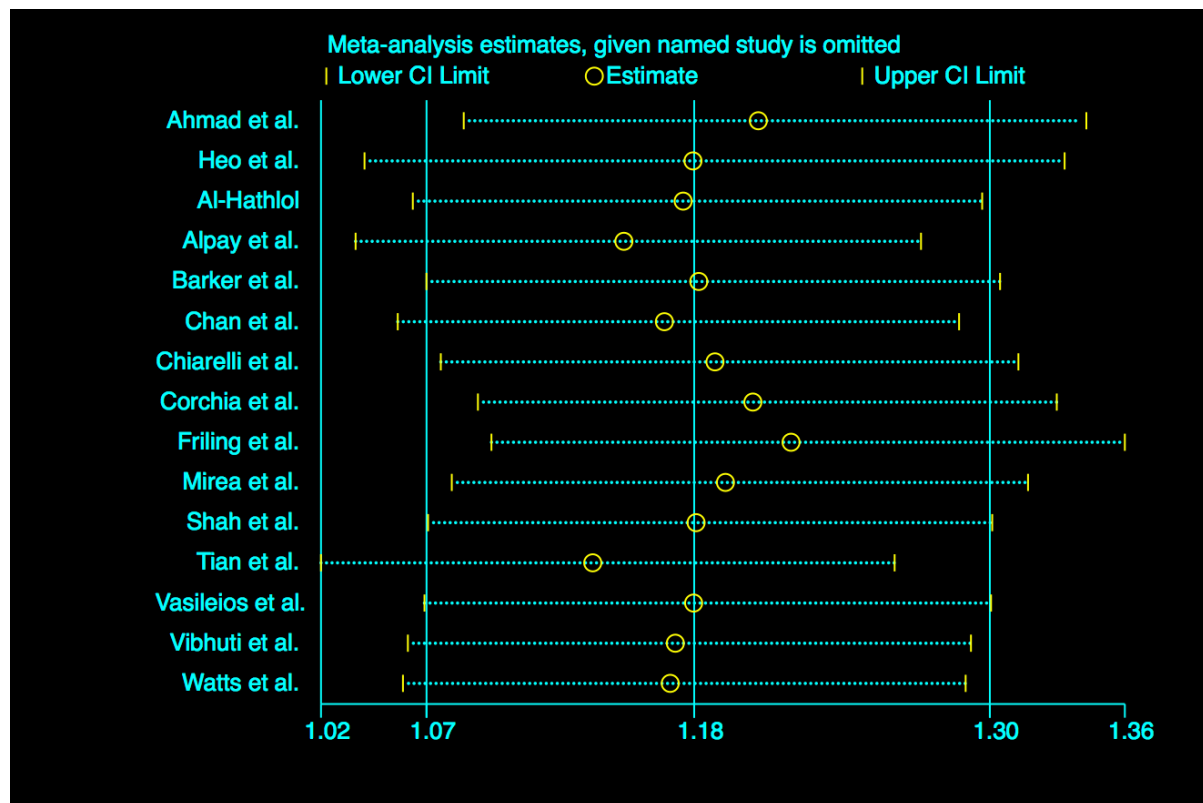

**Supplementary Figure 1** The sensitivity analysis of the main meta-analysis. Each estimate with its 95% CI was the results after omitting the corresponding study. It showed that all estimates were located within the general 95% CI (1.07-1.30). CI: confidence interval.
